# Supplementary material for: Effect of the functionalized π-bridge on porphyrin sensitizers for dye-sensitized solar cells: an in-depth analysis of electronic structure, spectrum, excitation, and intramolecular electron transfer
Source: Royal Society of Chemistry journal article supplement (doi:10.1039/c5tc02286j), 2015-01-01
Supplement: c5tc02286j1.pdf [file c5tc02286j1.pdf]

## Electronic Supplementary Information (ESI)

### **Effect of functionalized $\pi$ -bridge on porphyrin sensitizers for dye-sensitized solar cells: An in-depth analysis of electronic structure, spectrum, excitation, and intramolecular electron transfer†**

Xiaoqing Lu,<sup>\*,‡</sup> Yang Shao,<sup>‡</sup> Shuxian Wei, Zigang Zhao, Ke Li, Chen Guo, Weili Wang, Mingmin Zhang, Wenyue Guo\*

*College of Science, China University of Petroleum, Qingdao, Shandong 266580, P. R. China*

\*Corresponding authors: Xiaoqing Lu and Wenyue Guo

E-mail address: luxq@upc.edu.cn and wyguo@upc.edu.cn

Telephone: 86-532-8698-3372; Fax numbers: 86-532-8698-3363

**Fig. S1** Simulated absorption spectra of the reference sensitizers **SM315** and **SM371** at the B3LYP/6-31G(d), CAM-B3LYP/6-31G(d), PBE0/6-31G(d), and M06/6-31G(d) levels.

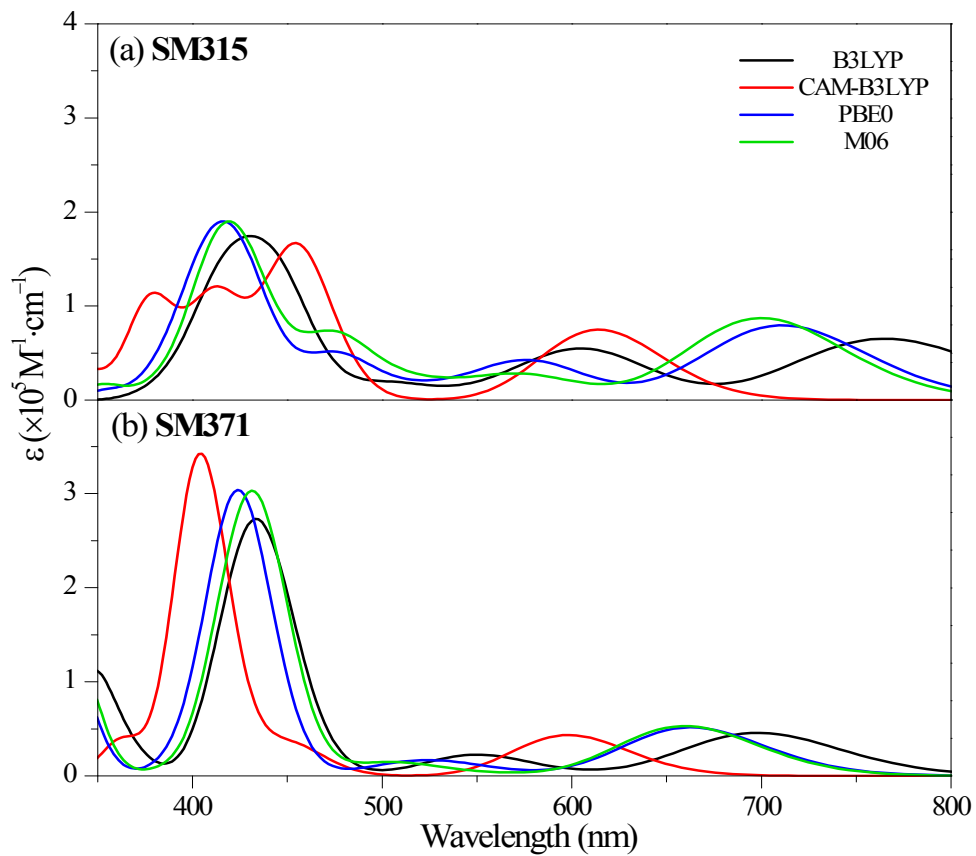

**Fig. S2** The first three frontier molecular orbitals of other porphyrin sensitizers. Isodensity contour = 0.02.

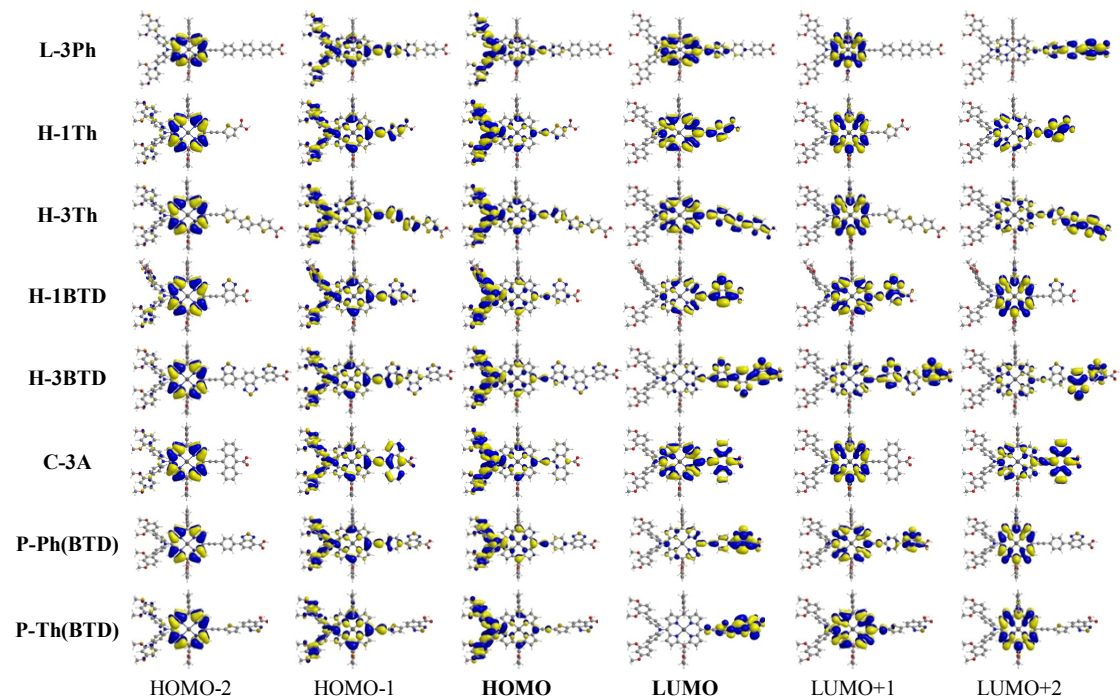

**Table S1.** The first three energy levels of all porphyrin sensitizers.

| Sensitizers      | H-2    | H-1    | HOMO   | LUMO   | L+1    | L+2    |
|------------------|--------|--------|--------|--------|--------|--------|
| <b>SM315</b>     | -2.277 | -2.317 | -2.853 | -4.775 | -5.210 | -5.328 |
| <b>P-Ph(BTD)</b> | -2.231 | -2.443 | -2.765 | -5.071 | -5.495 | -5.546 |
| <b>P-(BTD)Th</b> | -2.285 | -2.359 | -2.988 | -4.778 | -5.203 | -5.336 |
| <b>P-Th(BTD)</b> | -2.279 | -2.510 | -2.949 | -4.775 | -5.307 | -5.326 |
| <b>SM371</b>     | -1.599 | -2.279 | -2.611 | -4.777 | -5.246 | -5.328 |
| <b>L-2Ph</b>     | -1.721 | -2.260 | -2.548 | -4.754 | -5.188 | -5.309 |
| <b>L-3Ph</b>     | -1.771 | -2.253 | -2.526 | -4.745 | -5.165 | -5.302 |
| <b>H-1Th</b>     | -1.757 | -2.293 | -2.675 | -4.784 | -5.236 | -5.344 |
| <b>H-2Th</b>     | -2.051 | -2.280 | -2.674 | -4.755 | -5.140 | -5.331 |
| <b>H-3Th</b>     | -2.210 | -2.274 | -2.671 | -4.742 | -5.069 | -5.326 |
| <b>C-2A</b>      | -1.870 | -2.285 | -2.642 | -4.789 | -5.235 | -5.331 |
| <b>C-3A</b>      | -2.096 | -2.285 | -2.681 | -4.768 | -5.153 | -5.334 |
| <b>H-1BTD</b>    | -2.305 | -2.356 | -3.008 | -4.813 | -5.287 | -5.353 |
| <b>H-2BTD</b>    | -2.310 | -2.564 | -3.067 | -4.788 | -5.227 | -5.341 |
| <b>H-3BTD</b>    | -2.407 | -2.719 | -3.083 | -4.777 | -5.200 | -5.331 |

*Note:* All energies are in eV, where H = HOMO and L = LUMO.

**Table S2.** Selected excitation energies (E, nm), oscillator strengths ( $f$ ), and relative orbital contributions for the optical transition between 350 and 800 nm of other porphyrin sensitizers.

| E     | $f$   | Compositions <sup>a</sup> | E     | $f$   | Compositions               |
|-------|-------|---------------------------|-------|-------|----------------------------|
|       |       | <b>SM315</b>              | 410.8 | 0.238 | H→L+2(72%) H-2→L+1(13%)    |
| 700.2 | 0.801 | H→L(87%)                  | 365.1 | 0.233 | H-2→L+2(91%)               |
| 576.4 | 0.229 | H-1→L(83%)                | 354.9 | 0.083 | H-9→L(48%) H-1→L+2(17%)    |
| 544.9 | 0.033 | H→L+1(67%) H-2→L+2(15%)   |       |       | H-16→L(13%)                |
| 516.7 | 0.152 | H→L+2(47%) H-2→L(39%)     | 350.8 | 0.046 | H-15→L(64%) H-4→L+1(14%)   |
|       |       | H-1→L+2(12%)              | 337.5 | 0.808 | H→L+4(70%) H-16→L(13%)     |
| 475.1 | 0.576 | H-1→L+1(38%) H-2→L+2(24%) | 337.4 | 0.180 | H-16→L(54%) H→L+4(17%)     |
|       |       | H→L+1(16%) H-1→L(10%)     | 328.6 | 0.033 | H-10→L(89%)                |
| 473.0 | 0.038 | H-1→L+2(40%) H-2→L+1(39%) |       |       | <b>H-3Th</b>               |
|       |       | H-2→L(15%)                | 681.7 | 1.106 | H→L(89%)                   |
| 454.8 | 0.015 | H-3→L(93%)                | 573.5 | 0.361 | H-1→L(88%)                 |
| 429.6 | 0.992 | H-1→L+1(37%) H-2→L+2(23%) | 508.3 | 0.981 | H→L+2(46%) H-2→L+1(27%)    |
|       |       | H-7→L(17%) H-4→L(16%)     |       |       | H-1→L+2(10%)               |
| 412.3 | 0.947 | H-2→L+1(47%) H-1→L+2(38%) | 507.0 | 0.142 | H-1→L+1(44%) H→L+1(28%)    |
| 407.6 | 0.012 | H-5→L(92%)                |       |       | H-2→L(22%)                 |
| 400.5 | 0.212 | H-4→L(46%) H-2→L+2(17%)   | 468.9 | 0.486 | H→L+2(38%) H-4→L(36%)      |
| 389.9 | 0.012 | H-8→L(42%) H-7→L(21%)     |       |       | H-2→L+1(18%)               |
| 382.6 | 0.072 | H-7→L(25%) H-9→L(14%)     | 450.8 | 0.432 | H-1→L+1(42%) H-2→L(36%)    |
|       |       | H-8→L(12%) H-4→L(11%)     | 436.2 | 0.123 | H-3→L(87%)                 |
|       |       | H-3→L+2(10%)              | 430.8 | 0.045 | H-1→L+2(75%) H-4→L(12%)    |
| 380.9 | 0.047 | H-3→L+1(94%)              | 407.4 | 0.286 | H-4→L(38%) H-2→L+1(37%)    |
| 355.8 | 0.039 | H-15→L(66%)               | 406.3 | 0.094 | H-2→L+2(80%) H-4→L+1(10%)  |
| 352.5 | 0.086 | H-16→L(36%) H-4→L+1(19%)  | 374.4 | 0.533 | H-4→L+1(75%) H-2→L+2(11%)  |
|       |       | H-7→L+1(18%)              | 373.9 | 0.193 | H-4→L+2(41%) H→L+3(30%)    |
| 350.7 | 0.016 | H-14→L(36%) H-4→L+2(20%)  |       |       | H-7→L(11%)                 |
| 345.2 | 0.013 | H-4→L+1(33%) H-16→L(29%)  | 366.2 | 0.286 | H-4→L+2(37%) H→L+3(31%)    |
|       |       | <b>P-Ph(BTD)</b>          | 365.3 | 0.014 | H-5→L+1(89%)               |
| 673.9 | 0.715 | H→L(64%) H→L+1(27%)       | 365.0 | 0.012 | H-6→L+1(90%)               |
| 575.5 | 0.033 | H→L+1(61%) H→L(27%)       | 358.6 | 0.019 | H-12→L+1(60%) H-8→L+1(11%) |
| 555.4 | 0.110 | H-1→L(53%) H-1→L+1(26%)   | 356.1 | 0.032 | H-3→L+2(94%)               |
|       |       | H-2→L+2(12%)              | 348.4 | 0.010 | H-16→L(72%)                |
| 508.6 | 0.126 | H-2→L(40%) H→L+2(36%)     | 348.0 | 0.043 | H-11→L(42%) H-17→L(24%)    |
|       |       | H-1→L+2(21%)              |       |       | H-13→L(11%)                |
| 491.5 | 0.349 | H-1→L+1(40%) H-1→L(34%)   | 342.8 | 0.032 | H-14→L(72%)                |
|       |       | H-2→L+2(14%)              |       |       | <b>H-1BTD</b>              |
| 442.7 | 0.018 | H-3→L(79%) H-3→L+1(15%)   | 727.3 | 0.691 | H→L(89%)                   |
| 432.2 | 1.859 | H-2→L+2(47%) H-1→L+1(27%) | 588.0 | 0.232 | H-1→L(76%) H-2→L(10%)      |
| 417.8 | 0.952 | H-1→L+2(45%) H-2→L+1(38%) | 550.1 | 0.017 | H→L+1(74%) H-2→L+2(11%)    |
| 402.2 | 0.126 | H-3→L+1(82%) H-3→L(13%)   | 529.9 | 0.134 | H→L+2(59%) H-2→L(30%)      |
| 396.4 | 0.011 | H-4→L(41%) H-7→L(22%)     | 479.3 | 0.033 | H-3→L(33%) H-1→L+2(24%)    |
|       |       | H-2→L+2(10%)              |       |       | H-2→L+1(15%)               |
| 387.1 | 0.010 | H-3→L+2(93%)              | 478.7 | 0.453 | H-1→L+1(36%) H-2→L+2(23%)  |
| 364.4 | 0.019 | H→L+3(58%) H-6→L+2(11%)   |       |       | H→L+1(12%)                 |
| 357.8 | 0.047 | H-4→L+1(31%) H-4→L(10%)   | 477.1 | 0.024 | H-3→L(55%) H-2→L+1(25%)    |
| 349.3 | 0.043 | H-4→L+2(32%) H-15→L(21%)  |       |       | H-1→L+2(15%)               |
|       |       | H-15→L+1(21%)             | 425.3 | 0.017 | H-5→L(86%) H-4→L(10%)      |
| 346.8 | 0.055 | H-7→L+1(32%) H-4→L+1(20%) | 422.6 | 0.457 | H-6→L(38%) H-4→L(18%)      |
|       |       | <b>P-Th(BTD)</b>          |       |       | H-1→L+1(11%) H-2→L+2(10%)  |
| 725.4 | 1.018 | H→L(82%) H→L+1(11%)       | 421.8 | 0.458 | H-6→L(55%) H-2→L+2(12%)    |
| 598.5 | 0.243 | H-1→L(66%) H→L+1(26%)     |       |       | H-1→L+1(12%)               |
| 582.6 | 0.067 | H→L+1(50%) H→L(15%)       | 408.5 | 0.805 | H-1→L+2(25%) H-2→L+1(24%)  |

|       |       |                            |       |       |                           |
|-------|-------|----------------------------|-------|-------|---------------------------|
|       |       | H-1→L(15%) H-2→L+2(11%)    |       |       | H-1→L+1(13%) H-4→L(13%)   |
| 526.6 | 0.120 | H-2→L(53%) H→L+2(39%)      |       |       | H-2→L+2(12%)              |
| 505.4 | 0.281 | H-1→L+1(55%) H-2→L+2(20%)  | 408.2 | 0.369 | H-4→L(41%) H-2→L+1(17%)   |
|       |       | H-1→L(10%)                 |       |       | H-1→L+2(15%)              |
| 466.5 | 0.011 | H-3→L(92%)                 | 403.4 | 0.032 | H-7→L(80%)                |
| 455.3 | 0.903 | H-4→L(40%) H-1→L+1(20%)    | 388.0 | 0.129 | H-3→L+1(93%)              |
|       |       | H-2→L+2(19%) H-7→L(12%)    | 375.5 | 0.153 | H-9→L(61%)                |
| 424.2 | 0.813 | H-2→L+1(44%) H-1→L+2(41%)  | 365.5 | 0.024 | H-15→L(70%) H-6→L+2(10%)  |
| 419.4 | 0.519 | H-4→L(36%) H-2→L+2(32%)    |       |       | <b>H-3BTD</b>             |
| 404.5 | 0.104 | H-3→L+1(90%)               | 739.4 | 1.062 | H→L(78%) H→L+1(12%)       |
| 378.4 | 0.041 | H→L+3(69%) H-4→L+1(12%)    | 610.9 | 0.094 | H→L+1(41%) H-1→L(32%)     |
| 369.2 | 0.173 | H-4→L+1(58%)               |       |       | H→L+2(11%)                |
| 361.5 | 0.027 | H-8→L+2(41%) H-12→L+2(20%) | 601.5 | 0.314 | H-1→L(44%) H→L+1(19%)     |
|       |       | H-9→L+2(12%)               |       |       | H→L(16%) H-1→L+1(11%)     |
| 359.3 | 0.022 | H-12→L+2(38%) H-8→L+2(19%) | 538.1 | 0.082 | H-2→L(52%) H→L+3(40%)     |
|       |       | H-4→L+2(19%) H-9→L+2(15%)  | 534.3 | 0.039 | H→L+2(38%) H→L+1(21%)     |
| 355.7 | 0.034 | H-16→L(51%) H-16→L+1(19%)  |       |       | H→L+4(19%) H-2→L+3(12%)   |
| 354.4 | 0.055 | H-4→L+2(31%) H-12→L+2(28%) | 518.5 | 0.148 | H-1→L+1(52%) H-1→L(12%)   |
|       |       | H-14→L(17%) H-14→L+1(10%)  |       |       | H-2→L+3(10%)              |
|       |       | <b>SM371</b>               | 495.3 | 0.043 | H-1→L+3(37%) H-2→L+1(29%) |
| 659.5 | 0.487 | H→L(91%)                   |       |       | H→L+3(17%)                |
| 546.3 | 0.029 | H-1→L(75%) H-2→L+1(19%)    | 488.8 | 0.048 | H→L+4(46%) H→L+2(36%)     |
| 504.2 | 0.129 | H→L+1(40%) H-1→L+1(31%)    |       |       | H-1→L+4(10%)              |
|       |       | H-2→L(28%)                 | 475.0 | 0.028 | H-3→L(90%)                |
| 437.2 | 0.064 | H-3→L(83%)                 | 474.3 | 0.720 | H-4→L(44%) H-1→L+1(16%)   |
| 435.8 | 2.135 | H-2→L+1(61%) H-1→L(18%)    |       |       | H→L+4(10%)                |
| 418.1 | 0.985 | H-1→L+1(52%) H-2→L(26%)    | 458.6 | 0.016 | H-1→L+2(30%) H-4→L(25%)   |
|       |       | H-3→L(15%)                 |       |       | H-1→L+1(12%) H-1→L+4(10%) |
| 393.6 | 0.041 | H→L+2(74%)                 | 455.9 | 0.061 | H-2→L+1(50%) H-1→L+3(18%) |
| 388.3 | 0.013 | H-3→L+1(97%)               |       |       | H-2→L+2(16%) H-2→L+4(13%) |
| 385.6 | 0.016 | H-11→L(61%) H-12→L(21%)    | 428.8 | 0.102 | H-1→L+2(40%) H-1→L+4(28%) |
|       |       | H-9→L(12%)                 | 422.4 | 0.076 | H-3→L+1(68%)              |
| 349.9 | 0.045 | H-9→L(49%) H-16→L(11%)     | 420.7 | 0.372 | H-1→L+4(36%) H-2→L+3(24%) |
|       |       | H-2→L+2(11%)               |       |       | H-4→L+1(15%)              |
| 349.9 | 0.076 | H-2→L+2(63%) H-15→L(11%)   | 420.1 | 0.013 | H-5→L(84%) H-5→L+1(11%)   |
| 348.2 | 0.093 | H-15→L(48%) H-2→L+2(20%)   | 413.9 | 0.667 | H-2→L+2(49%) H-1→L+3(27%) |
|       |       | H-6→L+1(10%)               |       |       | H-3→L+1(14%)              |
| 343.9 | 0.015 | H-13→L(67%) H-15→L(12%)    | 407.9 | 0.161 | H-2→L+4(78%) H-2→L+2(10%) |
| 338.2 | 0.984 | H→L+4(88%)                 | 405.4 | 0.149 | H-7→L(50%) H-4→L+1(18%)   |
| 325.0 | 0.015 | H→L+3(83%)                 |       |       | H-4→L(13%)                |
| 324.5 | 0.030 | H-10→L(90%)                | 401.9 | 0.221 | H-4→L+1(35%) H-7→L(19%)   |
|       |       | <b>L-3Ph</b>               |       |       | H-7→L+1(12%)              |
| 651.2 | 0.593 | H→L(90%)                   | 393.4 | 0.016 | H-12→L(29%) H-12→L+1(20%) |
| 543.5 | 0.042 | H-1→L(78%) H-2→L+1(16%)    |       |       | H-11→L(11%)               |
| 501.1 | 0.104 | H-1→L+1(41%) H→L+1(32%)    | 387.5 | 0.011 | H-3→L+3(95%)              |
|       |       | H-2→L(25%)                 | 379.9 | 0.025 | H-3→L+2(77%) H-3→L+4(12%) |
| 443.8 | 2.540 | H-2→L+1(58%) H-1→L(15%)    |       |       | <b>C-3A</b>               |
| 430.5 | 0.334 | H-3→L(49%) H-1→L+1(24%)    | 677.0 | 0.657 | H→L(90%)                  |
|       |       | H-2→L(22%)                 | 565.5 | 0.132 | H-1→L(86%)                |
| 418.9 | 0.704 | H-3→L(49%) H-1→L+1(28%)    | 508.1 | 0.125 | H→L+1(37%) H-1→L+1(32%)   |
|       |       | H-2→L(17%)                 |       |       | H-2→L(28%)                |
| 377.3 | 0.038 | H-4→L(59%) H-11→L(13%)     | 500.2 | 0.544 | H→L+2(43%) H-2→L+1(30%)   |
| 361.9 | 0.032 | H-7→L(58%) H-8→L(10%)      |       |       | H-1→L+2(10%) H-4→L(10%)   |
| 355.3 | 0.067 | H-1→L+2(82%)               | 473.3 | 0.160 | H-4→L(49%) H→L+2(36%)     |
| 351.9 | 0.025 | H-4→L+1(46%) H-2→L+2(29%)  | 449.9 | 0.277 | H-1→L+1(45%) H-2→L(28%)   |
| 347.8 | 0.120 | H-2→L+2(62%) H-4→L+1(18%)  |       |       | H-3→L(14%)                |
| 339.4 | 0.046 | H-13→L(35%) H-17→L(30%)    | 438.9 | 0.114 | H-3→L(82%)                |
|       |       | H-16→L+1(12%)              | 427.6 | 0.225 | H-1→L+2(54%) H-4→L(19%)   |

|       |       |                          |       |       |                             |
|-------|-------|--------------------------|-------|-------|-----------------------------|
| 339.1 | 0.957 | H→L+4(83%) H-1→L+4(10%)  |       |       | H→L+2(13%)                  |
| 338.6 | 0.029 | H-14→L(47%) H-4→L+1(14%) | 410.1 | 0.138 | H-2→L+2(67%) H-4→L+1(20%)   |
|       |       | H-7→L+1(14%) H-16→L(13%) | 405.1 | 0.553 | H-2→L+1(34%) H-1→L+2(24%)   |
| 332.1 | 0.228 | H-7→L+1(72%) H-14→L(15%) |       |       | H-4→L(16%) H-4→L+2(14%)     |
|       |       | <b>H-1Th</b>             | 382.2 | 0.015 | H-7→L(55%) H-8→L(34%)       |
| 671.2 | 0.541 | H→L(91%)                 | 378.6 | 0.684 | H-4→L+1(71%) H-2→L+2(17%)   |
| 554.9 | 0.067 | H-1→L(79%) H-2→L+1(15%)  | 378.4 | 0.011 | H-8→L(54%) H-7→L(32%)       |
| 507.3 | 0.135 | H→L+1(42%) H-1→L+1(29%)  | 371.2 | 0.394 | H-4→L+2(72%)                |
|       |       | H-2→L(28%)               | 357.9 | 0.017 | H-12→L+1(70%) H-11→L+1(18%) |
| 448.1 | 1.786 | H-2→L+1(54%) H→L+2(18%)  | 351.8 | 0.034 | H-3→L+2(95%)                |
|       |       | H-1→L(13%)               | 349.3 | 0.011 | H-17→L(79%)                 |
| 444.1 | 0.053 | H-3→L(83%)               | 343.8 | 0.024 | H-14→L(78%)                 |
| 425.1 | 0.834 | H-1→L+1(52%) H-2→L(25%)  | 343.6 | 0.035 | H-16→L(49%) H-16→L+2(16%)   |
|       |       | H-3→L(14%)               |       |       | H-1→L+5(14%) H-4→L+5(10%)   |

<sup>a</sup> Only oscillator strength  $f > 0.01$  and orbital percentage  $> 10\%$  are reported, where H = HOMO and L = LUMO.

**Table S3.** The values of HOMO and LUMO energies, the HOMO-LUMO gaps, the lowest vertical excitation energies (EA), oscillator strengths, and relative LHE (RLHE) of all porphyrin sensitizers calculated in THF solution.

| Sensitizers      | H      | L      | $\Delta$ H-L | $E_A$ | $f$   | RLHE  |
|------------------|--------|--------|--------------|-------|-------|-------|
| <b>SM315</b>     | -2.853 | -4.775 | 1.922        | 1.771 | 0.801 | 1.249 |
| <b>P-Ph(BTD)</b> | -2.765 | -5.071 | 2.306        | 1.840 | 0.715 | 1.197 |
| <b>P-(BTD)Th</b> | -2.988 | -4.778 | 1.790        | 1.686 | 0.961 | 1.321 |
| <b>P-Th(BTD)</b> | -2.949 | -4.775 | 1.826        | 1.709 | 1.018 | 1.341 |
| <b>SM371</b>     | -2.611 | -4.777 | 2.166        | 1.880 | 0.487 | 1.000 |
| <b>L-2Ph</b>     | -2.548 | -4.754 | 2.206        | 1.899 | 0.559 | 1.074 |
| <b>L-3Ph</b>     | -2.526 | -4.745 | 2.219        | 1.904 | 0.593 | 1.105 |
| <b>H-1Th</b>     | -2.675 | -4.784 | 2.109        | 1.847 | 0.541 | 1.057 |
| <b>H-2Th</b>     | -2.674 | -4.755 | 2.081        | 1.827 | 0.835 | 1.266 |
| <b>H-3Th</b>     | -2.671 | -4.742 | 2.071        | 1.819 | 1.106 | 1.367 |
| <b>C-2A</b>      | -2.642 | -4.789 | 2.147        | 1.871 | 0.527 | 1.043 |
| <b>C-3A</b>      | -2.681 | -4.768 | 2.087        | 1.831 | 0.657 | 1.157 |
| <b>H-1BTD</b>    | -3.008 | -4.813 | 1.805        | 1.705 | 0.691 | 1.181 |
| <b>H-2BTD</b>    | -3.067 | -4.788 | 1.721        | 1.673 | 0.913 | 1.302 |
| <b>H-3BTD</b>    | -3.083 | -4.777 | 1.694        | 1.677 | 1.062 | 1.355 |

Note: All energies are in eV, where H = HOMO and L = LUMO.
